# Supplementary material
Source: Royal Society of Chemistry journal article supplement (doi:10.1039/d5cp04904k)
Supplement: d5cp04904k1.pdf [file d5cp04904k1.pdf]

## Supporting Information

### **Two-dimensional Dirac semimetal OD-BC<sub>3</sub> as an ultrahigh-performance anode for Li-, Na-, and K-ion batteries**

Luyao Pan<sup>1</sup>, Zhiying Zhu<sup>1\*</sup>, Junfei Duan<sup>2\*</sup> and Huamin Hu<sup>2\*</sup>

*<sup>1</sup>School of Physics and Electronic Science, Changsha University of Science and  
Technology, Changsha 410114, China*

*<sup>2</sup>School of Materials Science and Engineering, Changsha University of Science and  
Technology, Changsha 410114, China*

\*Corresponding authors. E-mail: [zhuzy@csust.edu.cn](mailto:zhuzy@csust.edu.cn) (Z. Zhu),  
[junfei\\_duan@csust.edu.cn](mailto:junfei_duan@csust.edu.cn) (J. Duan), and [hmh@csust.edu.cn](mailto:hmh@csust.edu.cn) (H. Hu)

Figure S1

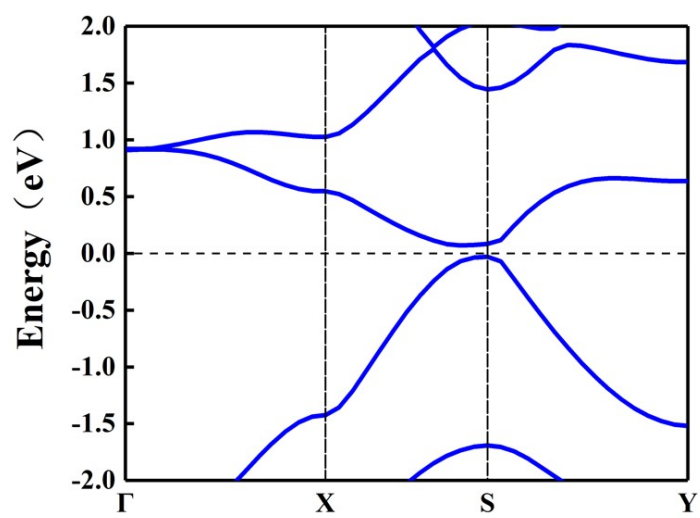

FIG. S1. Electronic band structures of BC<sub>3</sub> calculated using HSE06 functional.

Figure S2

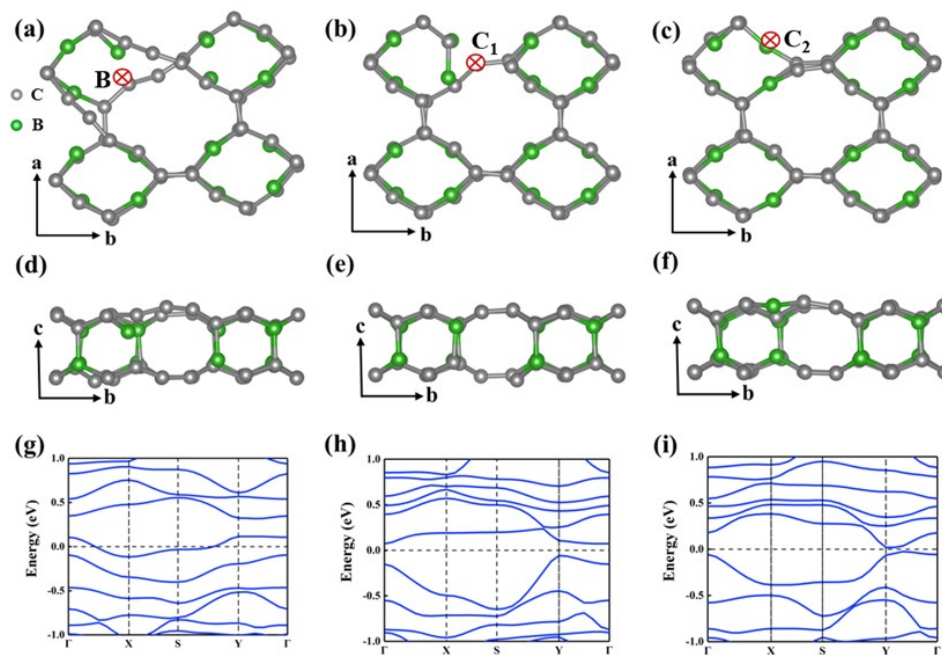

FIG. S2. The atomic structures (top and side views) and corresponding band structures of three vacancy defects in a  $2 \times 2 \times 1$   $BC_3$  supercell are presented: (a-c) boron vacancy (VB), (d-f) carbon vacancy adjacent to boron ( $VC_1$ ), and (g-i) carbon vacancy distant from boron ( $VC_2$ ). The defect atoms are highlighted in red for clear visualization.

Figure S3

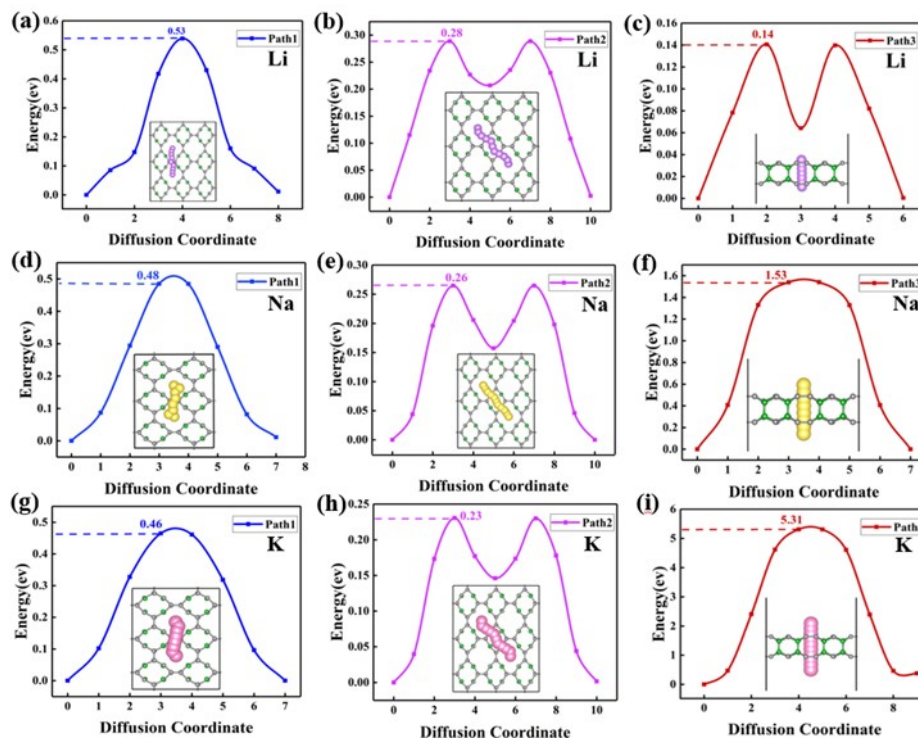

FIG. S3. Diffusion pathways and energy barriers for Li/Na/K migration on BC<sub>3</sub>.

**Figure S4**

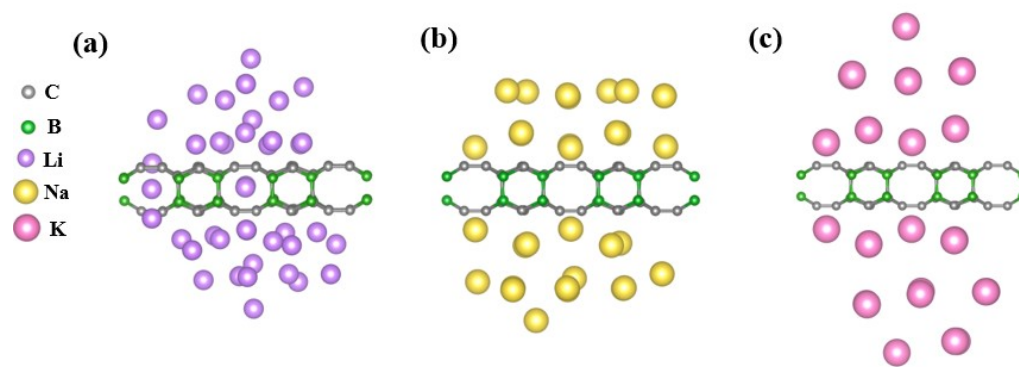

FIG. S4. Optimized maximum reversible adsorption configurations of Li, Na, and K on a  $2 \times 2 \times 1$  OD-BC<sub>3</sub> supercell with double-side adsorption (40 Li, 33 Na, and 32 K atoms, respectively).

**Figure S5**

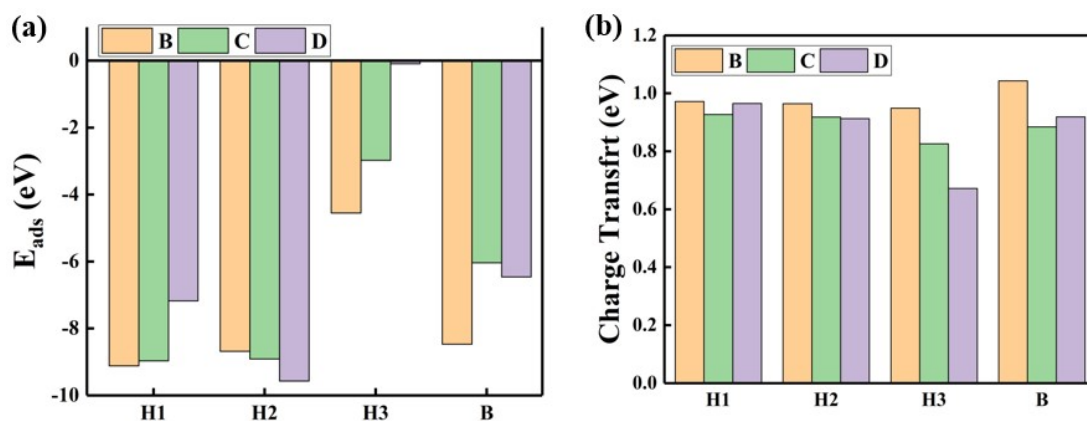

FIG.S5. Adsorption energies (a) and Bader charge transfer (b) for Li, Na, and K at four sites on OD-BC<sub>3</sub>, calculated with the optB88-vdW functional.

**Table S1.** The formation energies of the three defect types.

| Ads sites               | B            | C1           | C2           |
|-------------------------|--------------|--------------|--------------|
| $E_{ads}^{defect}$ (eV) | <b>-4.00</b> | <b>-3.74</b> | <b>-3.83</b> |

**Table S2.** The adsorption energies of solvent molecules (DEC, DMC, EC, and PC) on the BC<sub>3</sub> anode.

| Solvent molecule | DEC          | DMC          | EC           | PC           |
|------------------|--------------|--------------|--------------|--------------|
| $E_{ad}$ (eV)    | <b>-4.00</b> | <b>-3.74</b> | <b>-3.83</b> | <b>-3.91</b> |
